# Supplementary material
Source: PubMed Central journal article supplement (PMC4955750)

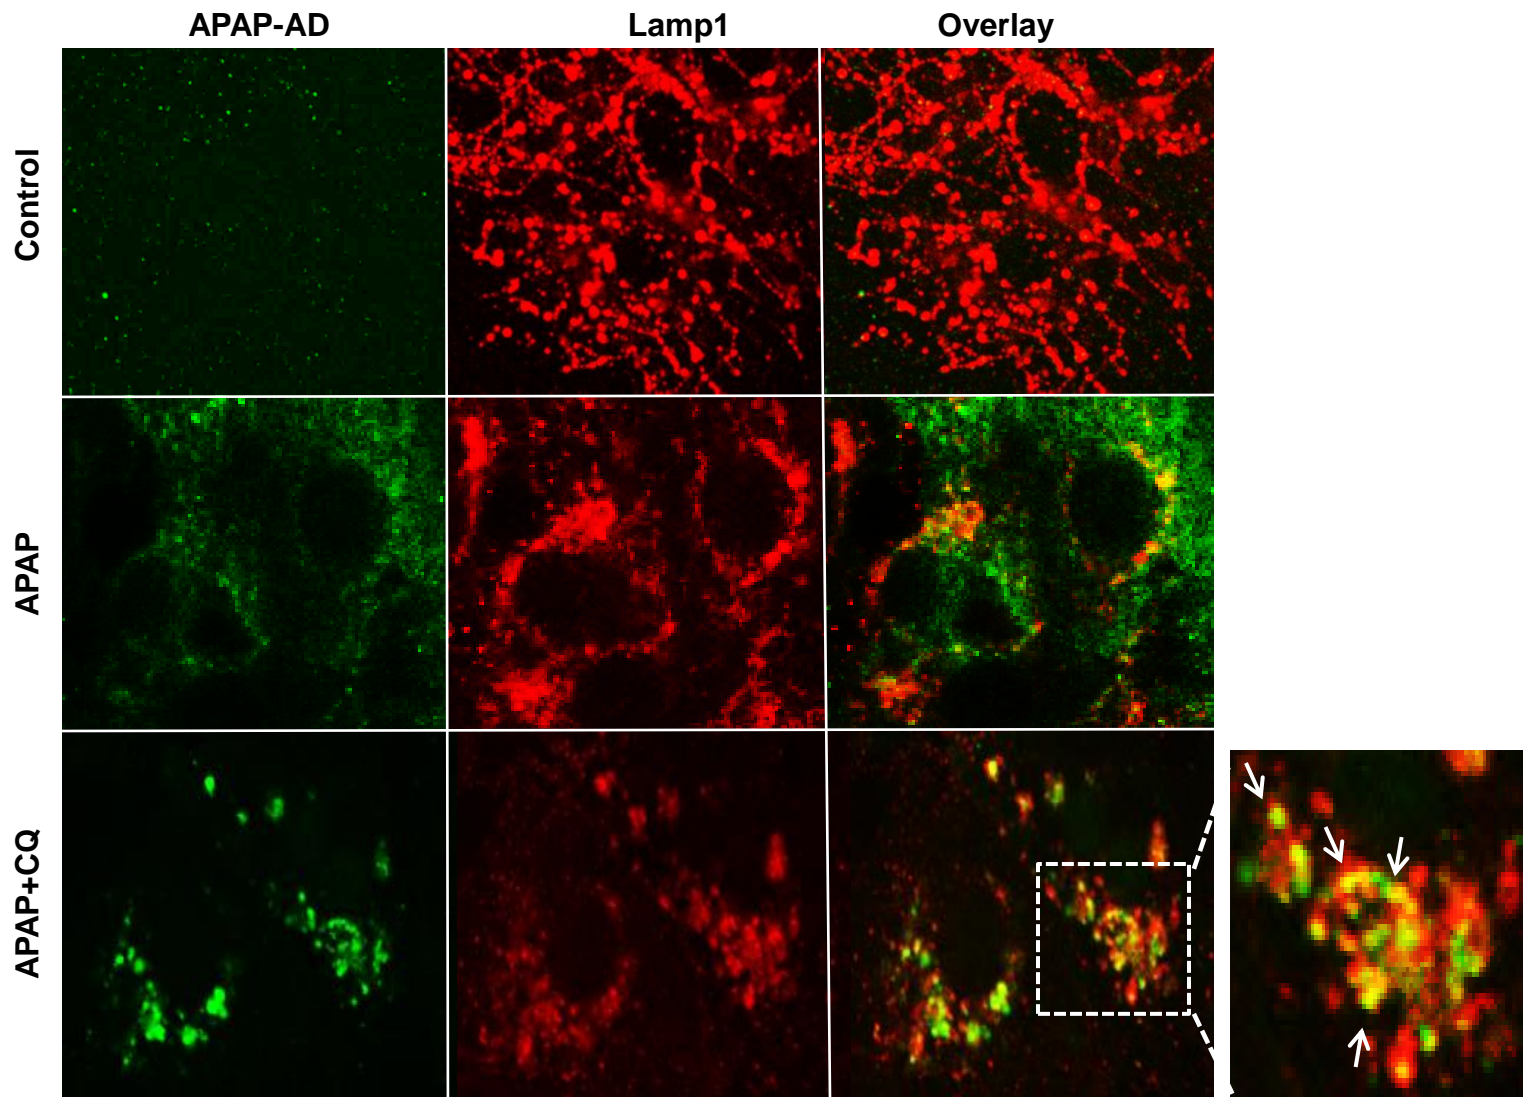

**A**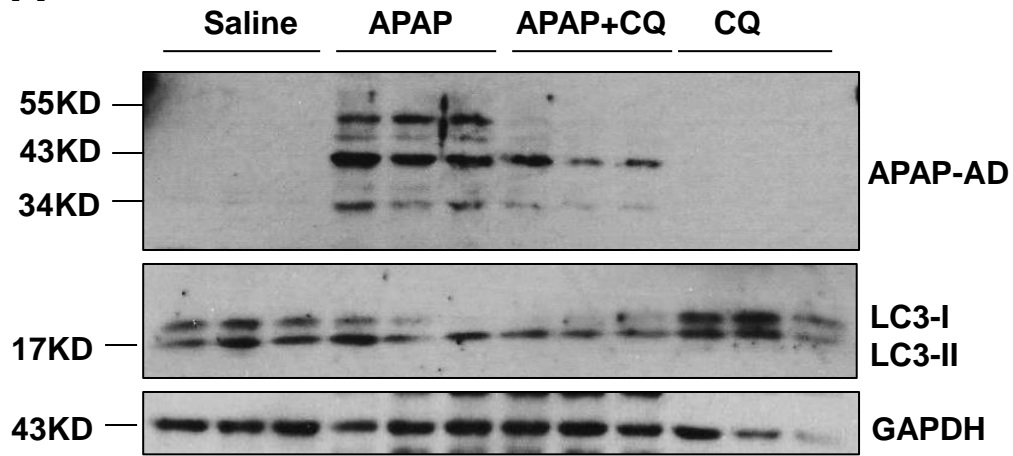**B**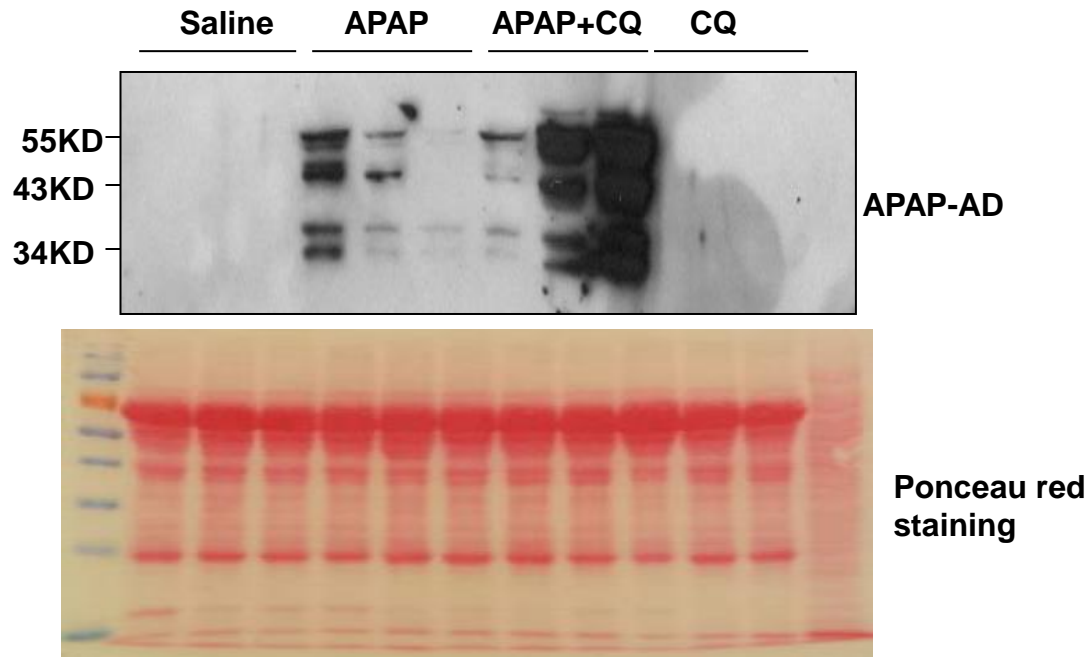



# Supplemental Figure 4

**A**

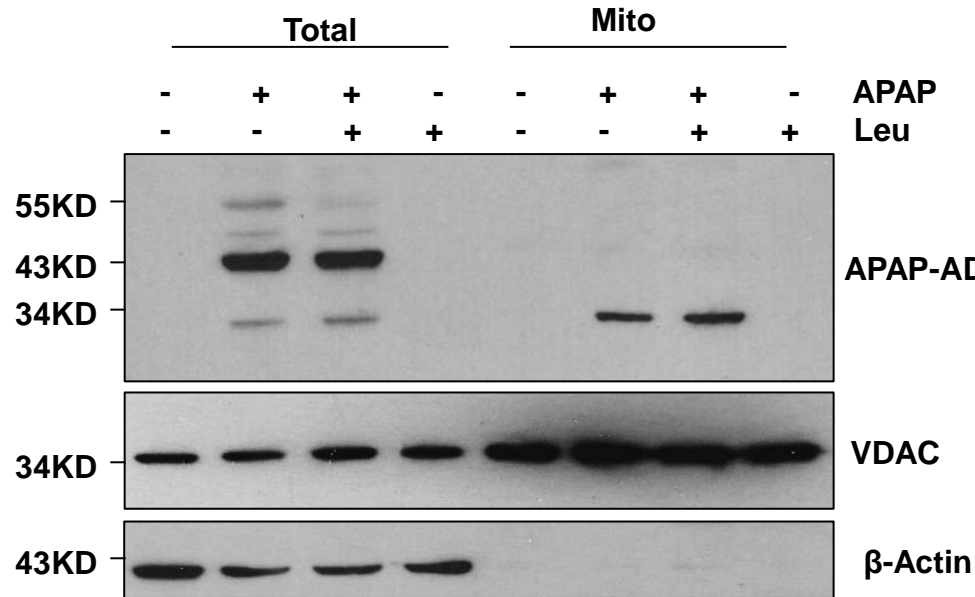

**B**

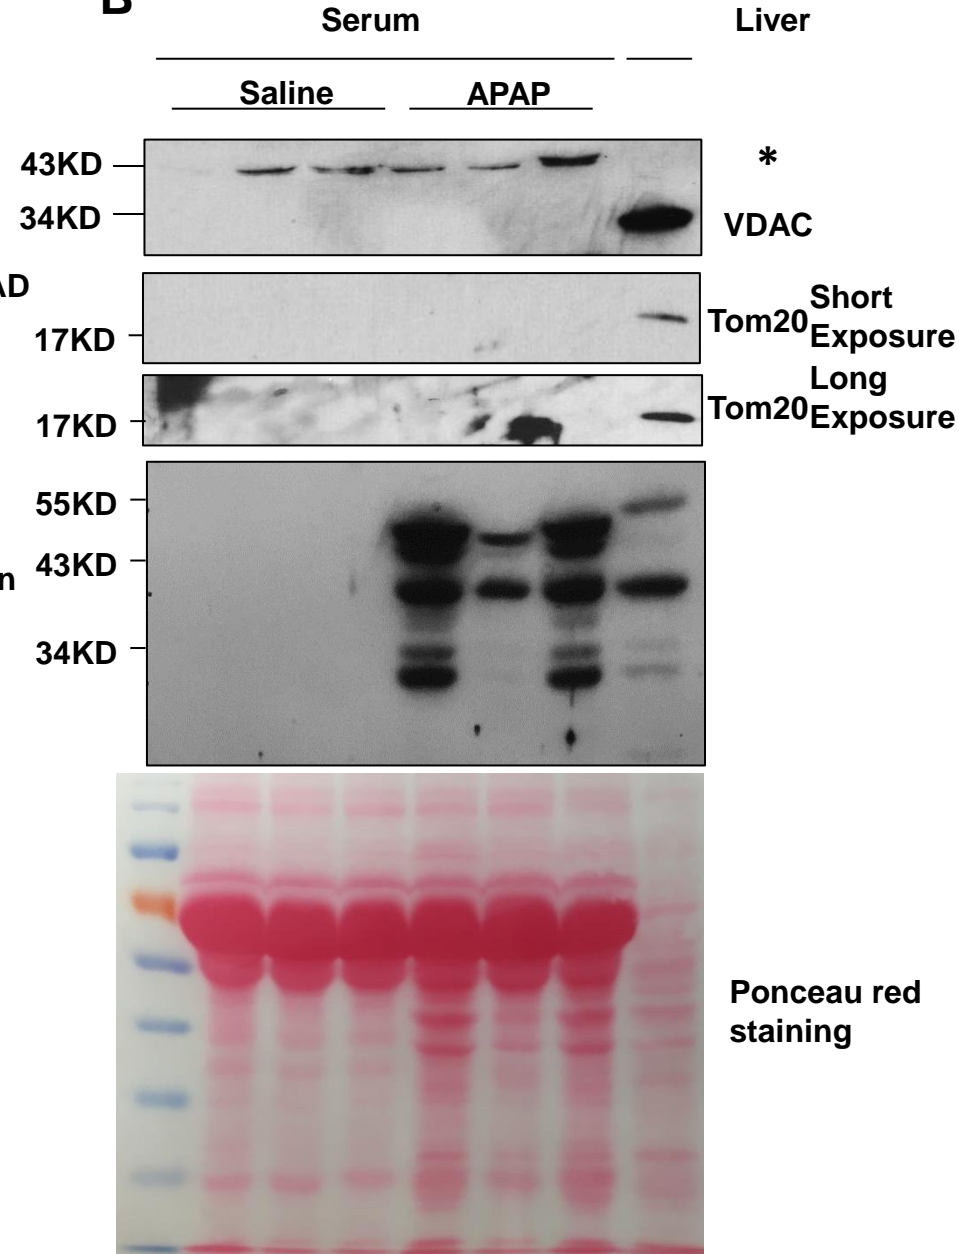

**6 Hours**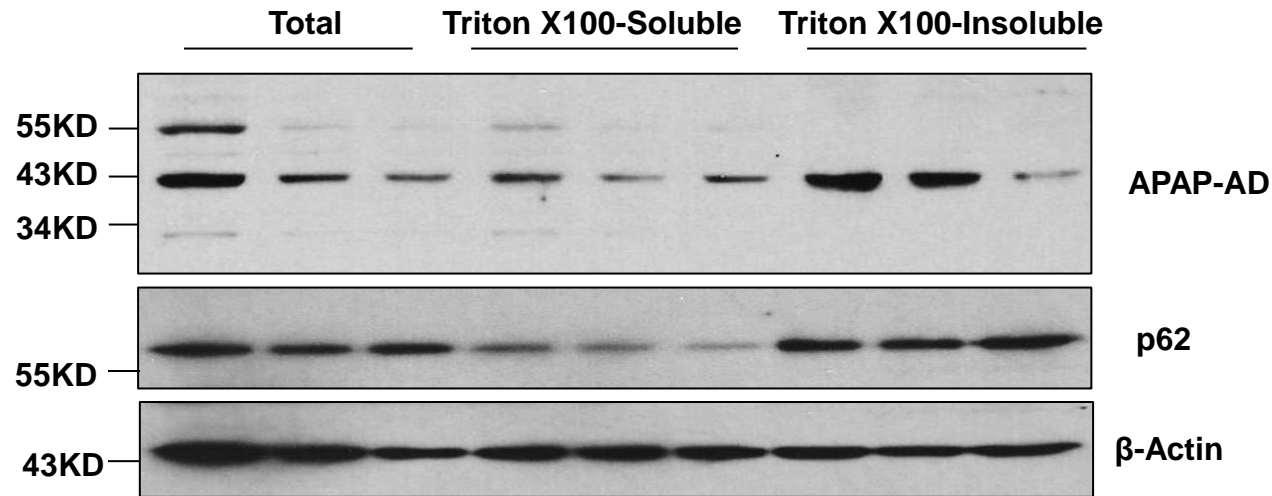**24 Hours**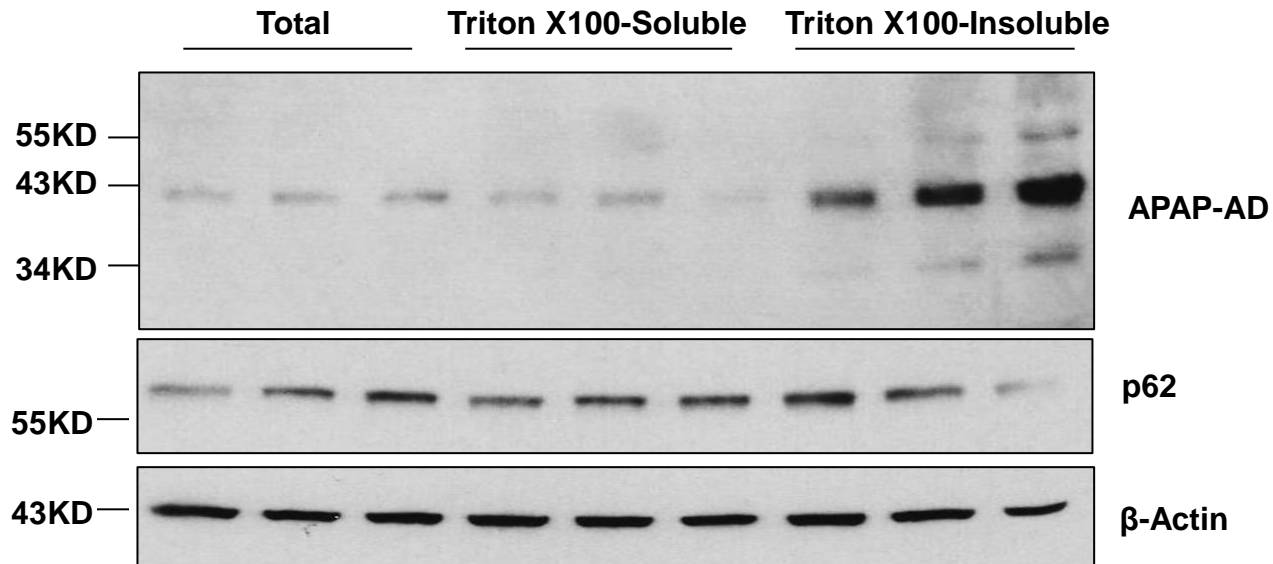

# Supplemental Figure 6

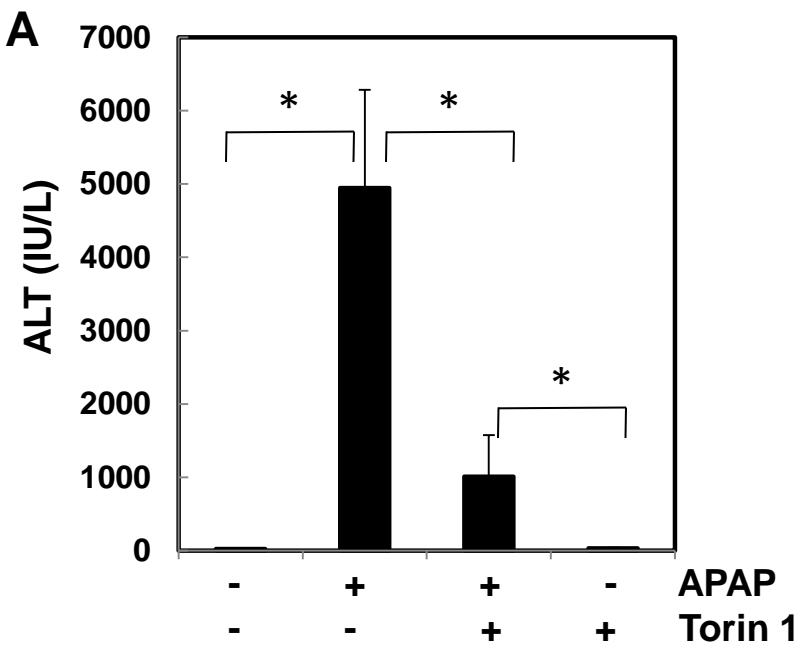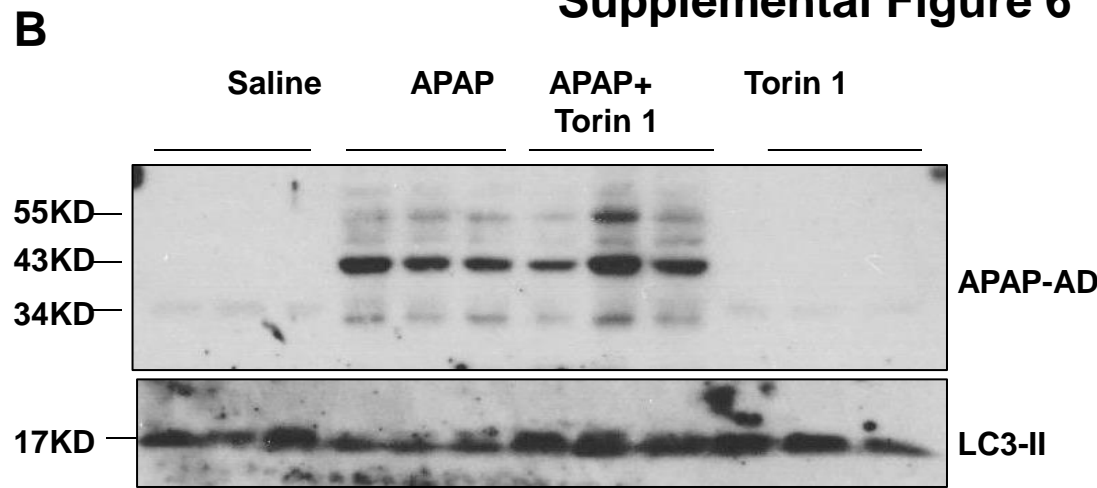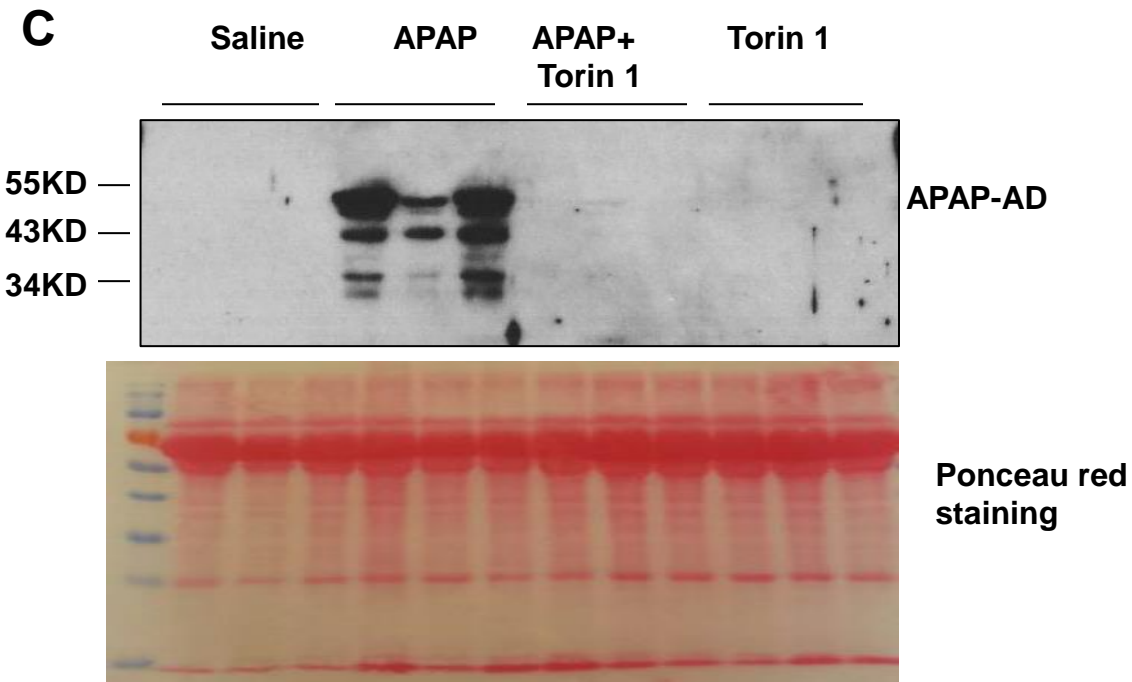



A

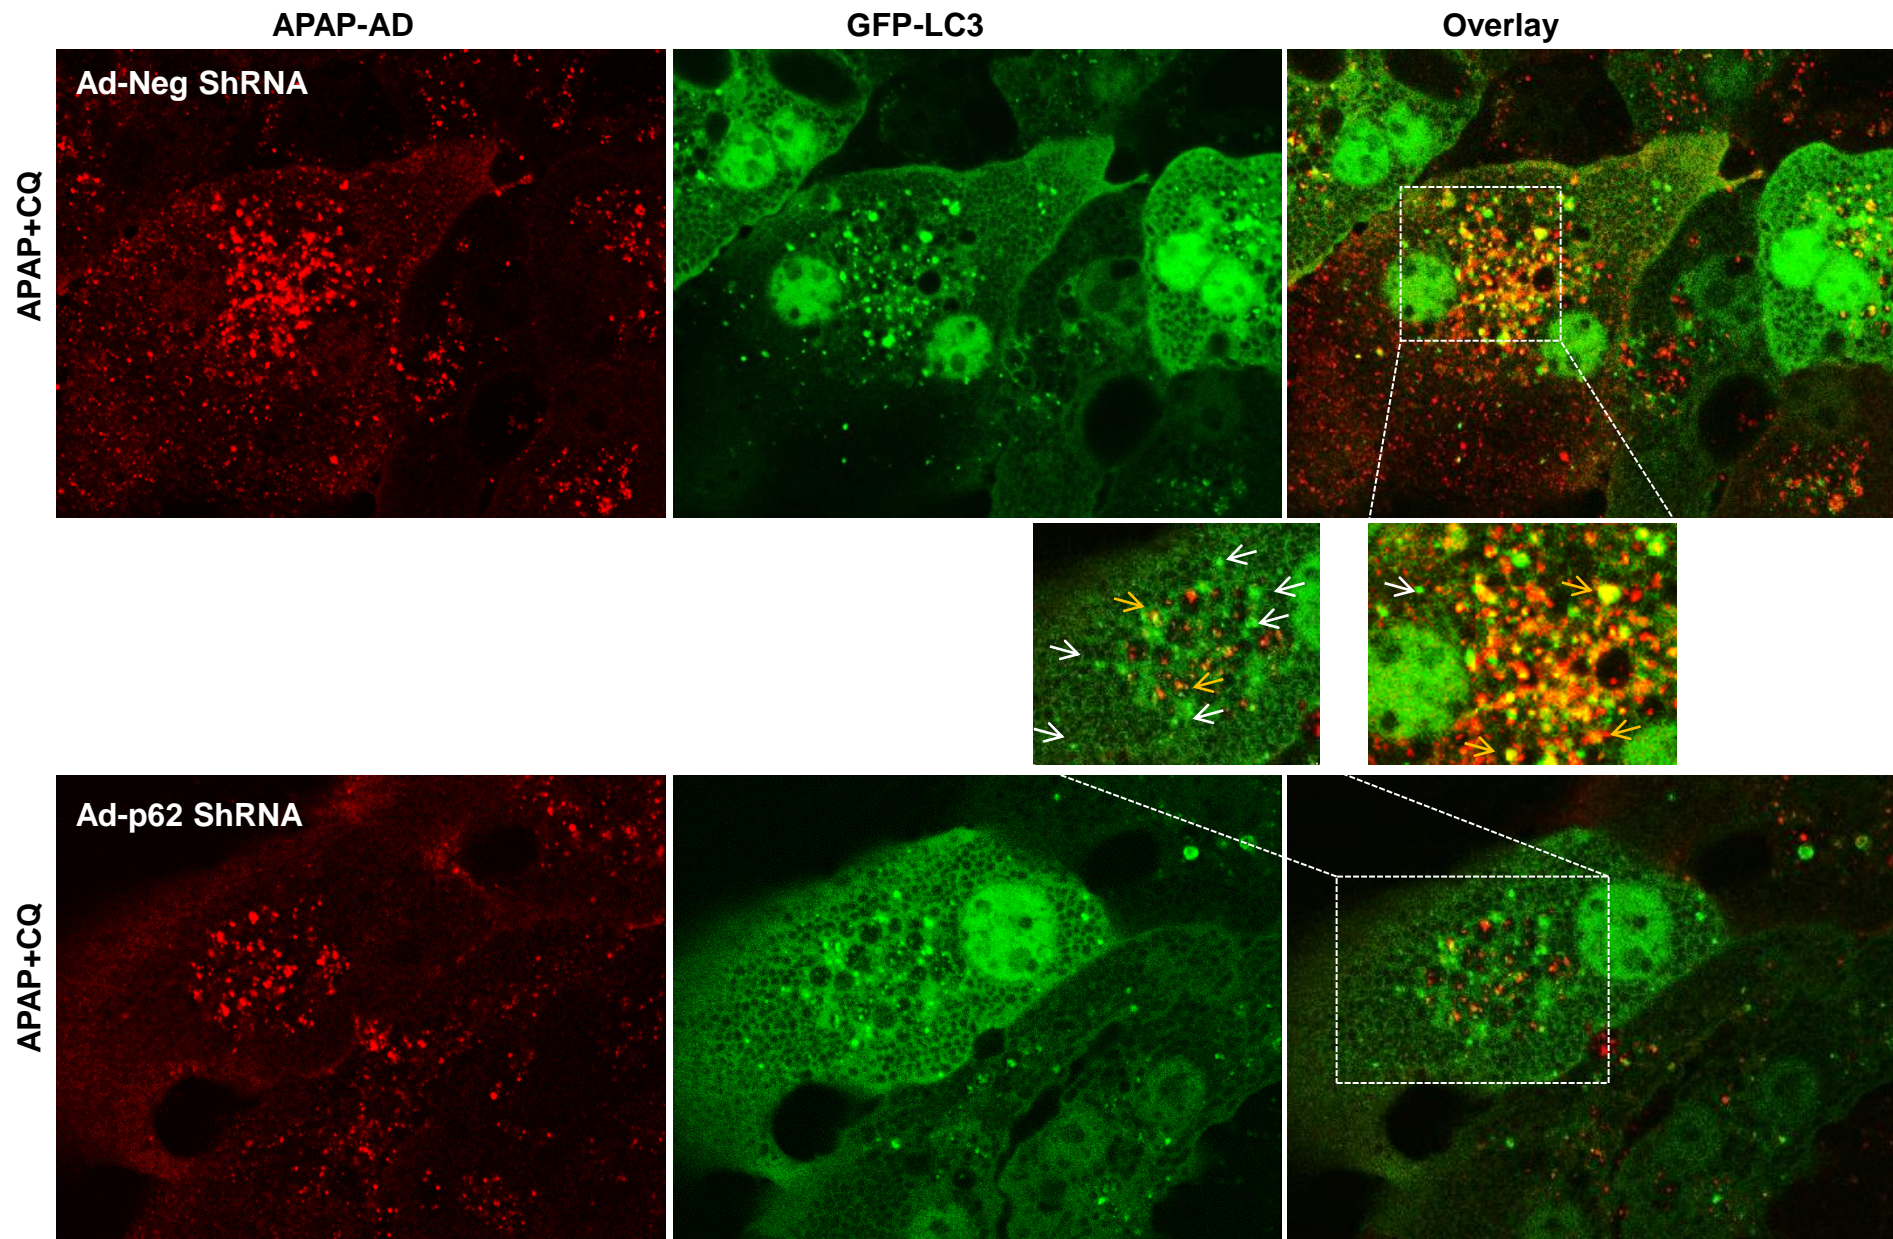

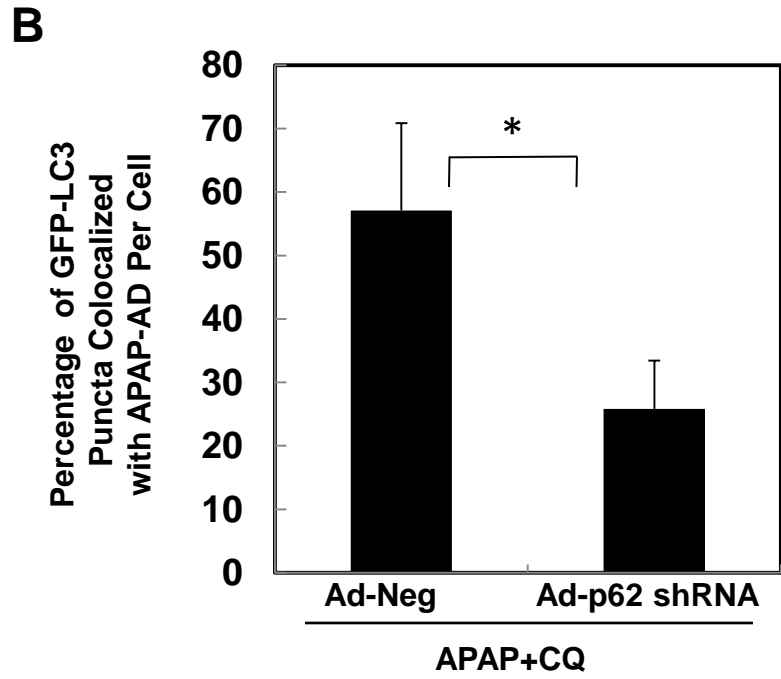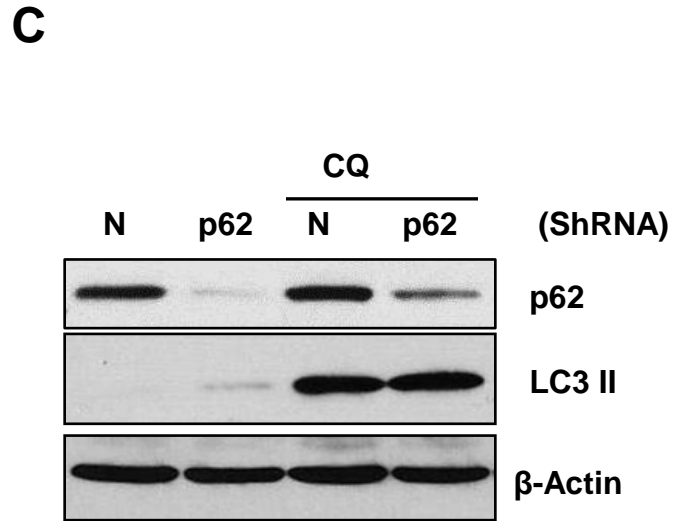

Supplement: NIHMS790800-supplement-1.pdf [file NIHMS790800-supplement-1.pdf]
